# Supplementary material for: Fast response–recovery time toward acetone by a sensor prepared with Pd doped WO3 nanosheets
Source: Royal Society of Chemistry journal article supplement (doi:10.1039/c9ra04429a), 2019-01-01
Supplement: c9ra04429a1.pdf [file c9ra04429a1.pdf]

## Supporting information

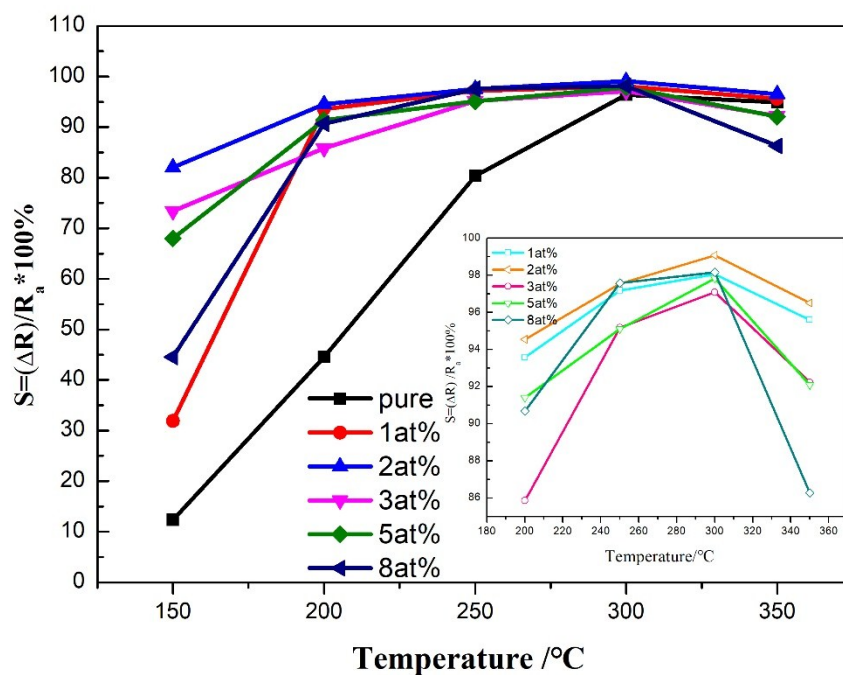

**Figure. S1.** Responses ( $S = (\Delta R/R_a) * 100\%$ ) curve of the sensors based on pure  $WO_3$ , 1 at%, 2 at%, 3 at%, 5 at% and 8 at% Pd- $WO_3$  at different working temperature toward 100 ppm acetone.

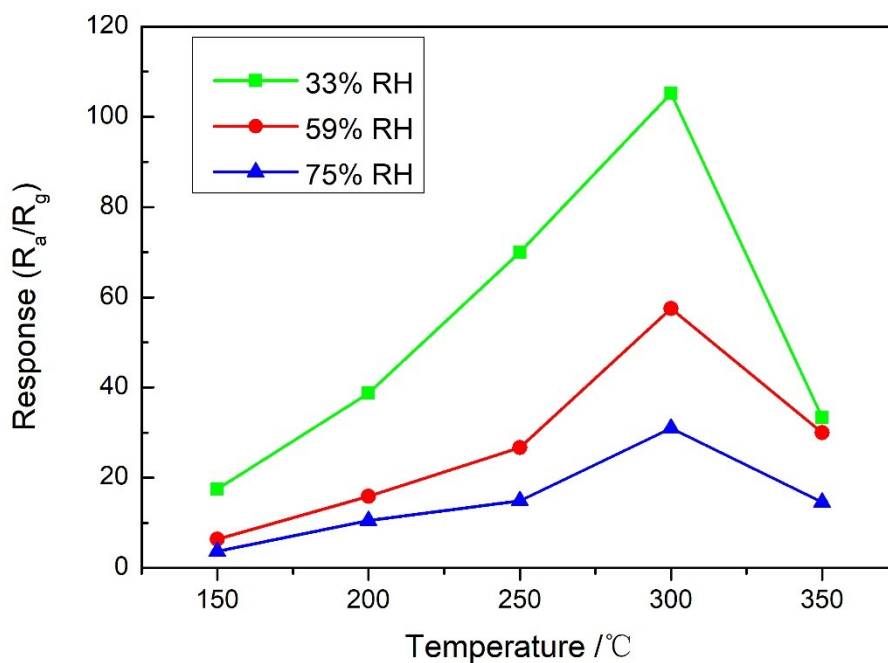

**Figure. S2.** Responses curve of the sensors based on 2 at% Pd-WO<sub>3</sub> at 33%, 59%, 75% relative humidity toward 100 ppm acetone.

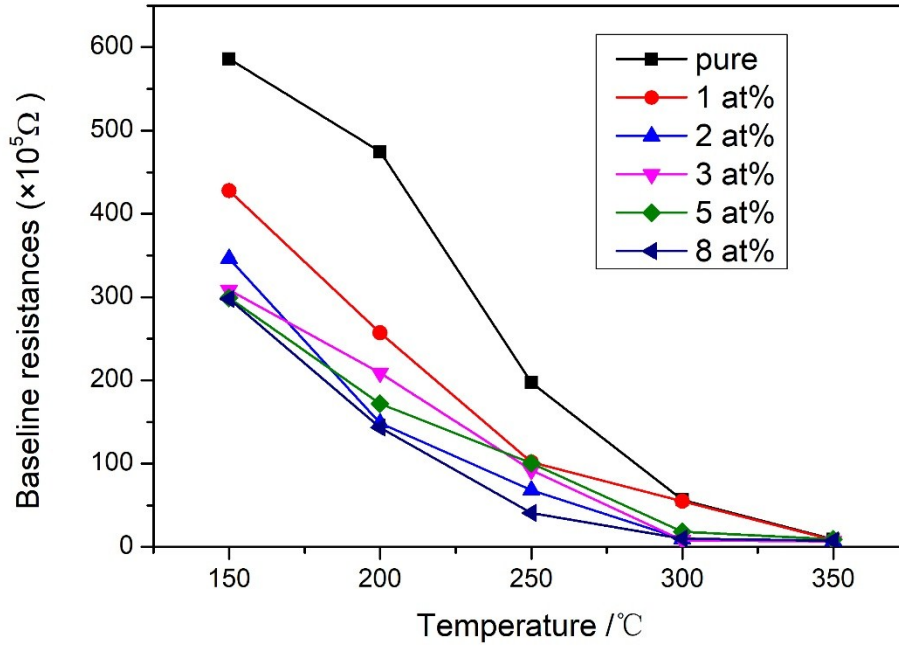

**Figure. S3.** The baseline resistances curve of the sensors based on pure WO<sub>3</sub>, 1 at%, 2 at%, 3 at%, 5 at% and 8 at% Pd-WO<sub>3</sub> at different working temperature toward 100 ppm acetone
